# Supplementary material for: Molecular Analysis of Twist1 and FGF Receptors in a Rabbit Model of Craniosynostosis: Likely Exclusion as the Loci of Origin
Source: Hindawi journal article supplement (doi:10.1155/2013/305971), 2013-01-01
Supplement: f1 [file 305971.f1.pdf]

|        |                                                               |
|--------|---------------------------------------------------------------|
| human  | ATGATGCAGGACGTGTCCAGCTCGCCAGTCTCGCCGGCCGACGACAGCCTGAGCAACAGC  |
| rabbit | ATGATGCAGGACGTGTCCAGCTCGCCAGTCTCGCCGGCCGACGACAGCCTGAGCAACAGC  |
|        | *****                                                         |
| human  | GAGGAAGAGCCAGACCGGCAGCAGCCGCCGAGCGGCAAGCGCGGGGGACGCAAGCGGCGC  |
| rabbit | GAGGAGGAGCCGGACCGGCAGCAGCCGCCGAGCGGCAAGCGCGGGGGCGCAAGCGGCGC   |
|        | *****.*****.*****.*****                                       |
| human  | AGCAGCAGGCGCAGCGCGGGCGGCGGCGGGGCCCGGCGGAGCCGCGGGTGGGGGCGTC    |
| rabbit | AGCAGCCGGCGCAGCGCGGGCGGCGGCGGGGCCCGGCGGGGCCGCGGGCGGGGCGTC     |
|        | *****.*****.*****                                             |
| human  | GGAGGCGGCGACGAGCCGGGCAGCCCGGCCAGGGCAAGCGCGGCAAGAAGTCTGCGGGC   |
| rabbit | GCAGCCGGCGATGAGCCCGGCAGCCCGGCAGGGCAAGCGCGGCAAGAAGTCTGCGGGC    |
|        | * ** ***** ***** *****                                        |
| human  | TGTGGCGGCGGCGGCGGCGCG-----GGCGGCGGCGGCGGCAGCAGC               |
| rabbit | TGCGGCGGTGGCGGCGGCGGCGGTGGTGGCGGCGCGGCGGCGGCGGTGGCGGCAGCAGC   |
|        | ** ***** *****                                                |
| human  | AGCGGCGGCGGGAGTCCGCAGTCTTACGAGGAGCTGCAGACGCAGCGGGTCATGGCCAAC  |
| rabbit | AGCGGCGGCGGGAGCCCGCAGTCGTACGAGGAGCTGCAGACGCAGCGGGTCATGGCCAAT  |
|        | ***** ***** *****                                             |
| human  | GTGCGGGAGCGCCAGCGCACCCAGTCGCTGAACGAGGCGTTCGCCGCGCTGCGGAAGATC  |
| rabbit | GTGCGGGAGCGCCAGCGCACGCAGTCGCTGAACGAGGCGTTCGCCGCGCTGCGGAAGATC  |
|        | ***** *****                                                   |
| human  | ATCCCCACGCTGCCCTCGGACAAGCTGAGCAAGATTACAGACCCTCAAGCTGGCGGCCAGG |
| rabbit | ATCCCCACGCTGCCCTCGGACAAGCTGAGCAAGATCCAGACGCTCAAGCTGGCCGCCAGG  |
|        | ***** ***** *****                                             |
| human  | TACATCGACTTCCTCTACCAGGTCCTCCAGAGCGACGAGCTGGACTCCAAGATGGCAAGC  |
| rabbit | TACATCGACTTCCTGTACCAGGTCCTGCAGAGCGACGAGCTGGACTCCAAGATGGCAAGC  |
|        | ***** ***** *****                                             |
| human  | TGCAGCTATGTGGCTCACGAGCGGCTCAGCTACGCCTTCTCGGTCTGGAGGATGGAGGGG  |
| rabbit | TGCAGCTACGTGGCCCACGAGCGGCTCAGCTACGCCTTCTCGGTCTGGAGGATGGAGGGG  |
|        | ***** *****                                                   |
| human  | GCCTGGTCCATGTCCGCGTCCCACTAG                                   |
| rabbit | GCCTGGTCCATGTCCGCGTCCCACTAG                                   |
|        | *****                                                         |

# CLUSTAL O(1.1.0) multiple sequence alignment

```

human      MMQDVSSSPVSPADDSLNSNEEFPDRQQPPSGKRGGRKRRSSRRSAGGGAGPGGAAGGGV
mouse      MMQDVSSSPVSPADDSLNSNEEFPDRQQPASGKRGARKRRSSRRSAGGSAGPGGATGGGI
rabbit     MMQDVSSSPVSPADDSLNSNEEFPDRQQPPSGKRGGRKRRSSRRSAGGGAGPGGAAGGGV
*****_*****_*****:***:

```

```

human      GGGDEPGSPAQGKRGKKSAGCGGGGGAG-----GGGGSSSGGSPQSYEELQTQRVMAN
mouse      GGGDEPGSPAQGKRGKKSAGGGGGGGAGG--GGGGGGSSSGGSPQSYEELQTQRVMAN
rabbit     AAGDEPGSPAQGKRGKKSAGCGGGGGGGGGAGGGGGSSSGGSPQSYEELQTQRVMAN
_.******_*****_******

```

```

human      VRERQRTQSLNEAFAALRKIIPTLP SDKLSKIQTLKLAARYIDFLYQVLQSD ELDSKMAS
mouse      VRERQRTQSLNEAFAALRKIIPTLP SDKLSKIQTLKLAARYIDFLYQVLQSD ELDSKMAS
rabbit     VRERQRTQSLNEAFAALRKIIPTLP SDKLSKIQTLKLAARYIDFLYQVLQSD ELDSKMAS
*****

```

```

human      CSYVAHERLSYAFSVWRMEGAWSMSASH
mouse      CSYVAHERLSYAFSVWRMEGAWSMSASH
rabbit     CSYVAHERLSYAFSVWRMEGAWSMSASH
*****

```

|        |      |    |                                                                                                 |      |
|--------|------|----|-------------------------------------------------------------------------------------------------|------|
| rabbit | 1    | GC | GGCGGGGGGGCGGGGGCGGGGGCGGAGGGCTCGGGCTCAGGACCTGGCGCGCGCGCG                                       | 66   |
| human  | 1    | GT | CGCGGGCAGCTGGCGCGCGCGGTCTGCTCTGCGGTCTGACGACGACGC--ACGGCGGGCGCGCGCGCGGAGGACGGGCGGAGCTGGCGCGCG    | 98   |
|        |      |    | ***                                                                                             |      |
| rabbit | 67   | G  | CTCGCGCGCG--GCCCGGGGCGGTGACGAGGTGCGCCCTCTCTCTCCGAGACTCGGCGTGCGCTTCTCTCTCTCGGGCGCGCGCGGGC        | 164  |
| human  | 99   | G  | ACAGCGAGCGGAGCGGGAGCGCGCTAGCGAGCGGGCTCCGGCGCTCGCAGTCTCCGAGCG--GCGCGCGCTCCCGCGGTGCGCGCGCGCG      | 197  |
|        |      |    | *****                                                                                           |      |
| rabbit | 165  | C  | GTGGGGGCGAGCATGCCCGCGCGCGCTGAGGACGCCG--CTCGGTCCCCGCTAGGGCGCCCGCGCGCGCTGGCACTCTGCTGGCCGT         | 261  |
| human  | 198  | C  | GTGGGGGCGAGCATGCCCGCGCGCGCTGAGGACGCCCGCGCGCGCGCATGGCGCGCTTCTGCTGCGCCTCTGCGCTCTGCTGGCGGT         | 297  |
|        |      |    | *****                                                                                           |      |
| rabbit | 262  | G  | TGTGTCTGGCGGCGTCTCTGGGAGCTGCGGGTCCGGAGCGCGTGTGTGCGGAGCGCCAGGGGTGCCGGTTGGAGCCAGCGCAGAGAA         | 361  |
| human  | 298  | G  | GCATCTGTGGCGGCGCTCTCGAGTCTTGGGAGCGGAGCGCGCTGTGGGCGAGCGGAGAGTCCCGGGCCAGAGCCCGCGCAGGAG            | 397  |
|        |      |    | *****                                                                                           |      |
| rabbit | 362  | C  | AGGTGTCTTTGGCAGTGGGACACCTGGAGCTGAGTGCACCTTCTGGAGTGGCCCCCTGGGCGCACCTGTGGTCAAGGACGGCACGGGC        | 461  |
| human  | 398  | C  | AGTGTGTCTTGGCAGCGGGATGCTGTGGAGCTGAGCTGTCCCCCGCGGGGTGTGTCCATGGGCGCACTGTCTGGTCAAGGATGGCAGGGC      | 497  |
|        |      |    | *****                                                                                           |      |
| rabbit | 462  | T  | GGCGTCCAGGACGCATCTGTGTGGGCTCAACGGCTGCAAGTGTGAACGCTCCAGGAGGACGGGGGCTACAGTGTCCGGCAGCGGCTCAC       | 561  |
| human  | 498  | T  | GGTGTCTCGAGCGTGTCTGTGGGGGCGCGCGCTGAGTGTGCTCTCCACGAGGACTCCGGGCGTACAGTGTCCGGCAGCGGCTCAC           | 597  |
|        |      |    | *****                                                                                           |      |
| rabbit | 562  | G  | CAGCGGTGTGCTGCCACTTATTGTGCGGTGACCGAGGCTCGTCTCGGAGATGACGAAGACGGCGAGGATGAGGCCGAAGACAGG-----       | 654  |
| human  | 598  | G  | CAGCGGTGACTGTGCCACTTACGTGTGCGGTGACAGCGCTCATCTCTGGAGATGACGAAGAGGGAGGAGGAGCTGAGGACACAGGTGTGAGC    | 697  |
|        |      |    | *****                                                                                           |      |
| rabbit | 655  | -  | -----GGCCCCCTACTGGACCGCGCGCGAGCGGATGGACAAGAAGCTGTGGCGGTGCCGGCGCAACACCGTCCGCTGCCCGCGCGCGGCA      | 749  |
| human  | 698  | A  | CAGGGCGCGCCCCCTACTGGACCGCGCGCGGATGGACAAGAAGTCTGCGCGTGTGCCCGCGCAACACCGTCCGCTTCTGCTGCCAGCGCTGGCA  | 797  |
|        |      |    | *****                                                                                           |      |
| rabbit | 750  | A  | CCCGACGCGCTCATCTCTGGCTGAAGAATGGCAAAGTTTGCGGCGAGCACCGCATCGCGGCTCAAGTGTGGCAGCAGAGTGGAGCTGGT       | 849  |
| human  | 798  | A  | CCCGACCTCCCTCATCTCTGGCTGAAGAATGGCAAAGTTCGCGGCGAGCACCGATTGGAGGATCAAGTGTGGCATGACAGTGGAGCTGGT      | 897  |
|        |      |    | *****                                                                                           |      |
| rabbit | 850  | G  | ATGGAGAGCGTGTGCCATCGGACCGCGGCACTACACGTGCTGGTGGAGAACAAAGTTCCGGCAGATCCGGCAGAGTACACGCTGACGTGCTGGAG | 949  |
| human  | 898  | C  | ATGGAAAGCGTGTGCCCTCGGACCGCGGCACTACACCTGCTGCTGGAGAACAAAGTTGGCAGATCCGGCAGAGTACACGCTGACGTGCTGGAG   | 997  |
|        |      |    | *****                                                                                           |      |
| rabbit | 950  | C  | GCTCCCCGACCGCGGCTCTGAGGCGGGGCTGCCGCAACGAGCGCGGTGCTGGGAGCGAGCTGGAGTTCACCTGCAAGGTGTACAGCGAC       | 1049 |
| human  | 998  | C  | GCTCCCCGACCGCGGCTCTGAGGCGGGGCTGCCGCAACGAGCGCGGTGCTGGGAGCGAGCTGGAGTTCACCTGCAAGGTGTACAGTACG       | 1097 |
|        |      |    | *****                                                                                           |      |
| rabbit | 1050 | C  | GCAGCGCACATCTCAGTGGCTGAAGCAGTGGAGGTGAACGGCAGCAAGTGGGCGCGGACGGCAGCGCTACGTACCGTGTGAAGACGGCGGGCGC  | 1149 |
| human  | 1098 | C  | CACAGCGCACATCTCAGTGGCTGAAGCAGTGGAGGTGAATGGCAGCAAGTGGGCGCGGAGCGCACACCTACGTACCTGCTCAAGAGCGCGGGCGC | 1197 |
|        |      |    | *****                                                                                           |      |
| rabbit | 1150 | T  | AACACCAACCGACAAGGAGCTAGAGTTCTGCTTTGCGCAATGTACCTTTGAGGATCGGGGAGTACAGTGCCTGGCGGCAATTCTATCGGGTTT   | 1249 |
| human  | 1198 | T  | AACACCAACCGACAAGGAGCTAGAGTTCTCTCTTGCACAACGTACCTTTGAGGACCGCGGGAGTACACCTGCCTGGCGGCAATTCTATTGGTTT  | 1297 |
|        |      |    | *****                                                                                           |      |
| rabbit | 1250 | T  | CCCATCACTCTGCGTGGTGGTGTGCTGCAGCGAGGAGGAGCTGCGCGCGCGGCGAGGCGGCGAGCGTGTACGCGGCGTCTCAGCTACGGC      | 1349 |
| human  | 1298 | T  | CTCATCACTCTGCGTGGTGGTGTGCTGCAGCGAGGAGGAGCTGCGGAGGCTGACGAGGCGGCGAGTGTATCGAGGATCTCAGCTACGGG       | 1397 |
|        |      |    | *****                                                                                           |      |
| rabbit | 1350 | C  | GGGCTTCTTCTCTTATCTCTGGTGGTGGGCGCGTGAAGTGTGAGTGTGAGTGTGAGTGTGAGTGTGAGTGTGAGTGTGAGTGTGAGTGTGAGT   | 1449 |
| human  | 1398 | T  | GGGCTTCTTCTCTTATCTCTGGTGGTGGGCGCGTGAAGTGTGAGTGTGAGTGTGAGTGTGAGTGTGAGTGTGAGTGTGAGTGTGAGTGTGAGT   | 1497 |
|        |      |    | *****                                                                                           |      |
| rabbit | 1450 | G  | TCCCGCTTCCCGCTGAAGCGCAGGTGTCTTGGAGTCCAGTGTGCTGAACCTCACGACGCGCTGTGCGGCTGGCGGCTGTCTCCGCGAG        | 1549 |
| human  | 1498 | C  | TCCCGCTTCCCGCTCAAGCGCAGGTGTCTTGGAGTCCAGCGCTGAGTGTGAGTGTGAGTGTGAGTGTGAGTGTGAGTGTGAGTGTGAGTGTGAGT | 1597 |
|        |      |    | *****                                                                                           |      |
| rabbit | 1550 | G  | GGCCACGCTGGCCAGCTGTCCGAGCTGAGTGTCCCGCGCAGCGGAGTGGGAGTGTCCGGGCGCGGTGACCTCGGGAAGCCCTGGGAGAG       | 1649 |
| human  | 1598 | G  | GGCCACGCTGGCCAGTGTCTCGAGCTGAGTGTCCCGCGCAGCGGAGTGGGAGTGTCCGGGCGCGGTGACCTCGGGAAGCCCTGGGAGAG       | 1697 |
|        |      |    | *****                                                                                           |      |
| rabbit | 1650 | G  | CTGCTTCCGCGAGGTGTCTATGGCGAGGCGCATCGGATGACAAGGACCGGCGCGCAAGCGCTACCGTGGCGTGAAGTGTGAAAGACGATGC     | 1749 |
| human  | 1698 | G  | CTGCTTCCGCGAGGTGTCTATGGCGAGGCGCATCGGATTGACAAGGACCGGCGCGCAAGCGCTGTACCGTGGCGTGAAGTGTGAAAGACGATGC  | 1797 |
|        |      |    | *****                                                                                           |      |
| rabbit | 1750 | C  | ACCGACAAGACCTGTGCGACCTGGTGTGCGGATGAGATGATGAGATGATCGGGAACACAAAACATCATCAACTGCTGGGCGCTGCACGCAG     | 1849 |
| human  | 1798 | C  | ACTGACAAGGACCTGTGCGACCTGGTGTGAGATGAGATGATGAGATGATCGGGAACACAAAACATCATCAACTGCTGGGCGCTGCACGCAG     | 1897 |
|        |      |    | *****                                                                                           |      |
| rabbit | 1850 | G  | GGCGGCGCTGTACGTGCTGGTGGAGTTCGCGGCAAGGCAACCTGCGGAGTACCTGCGGCGCGCGCGCTCCGGGATGAGTACTCTTGCACA      | 1949 |
| human  | 1898 | G  | GGCGGCGCTGTACGTGCTGGTGGAGTTCGCGGCAAGGCAACCTGCGGAGTACCTGCGGCGCGCGCGCTCCGGGATGAGTACTCTTGCACA      | 1997 |
|        |      |    | *****                                                                                           |      |
| rabbit | 1950 | C  | CTGACGCTGCCGAGGAGCGAGCTCACCTTCAAGGACCTGGTGTCTGCGCTACAGGTGGCGCGGCGATGGAGTACCTGGCCTCCGAGAAGTGAT   | 2049 |
| human  | 1998 | C  | CTGCAAGCGCGCGAGGAGCGAGCTCACCTTCAAGGACCTGGTGTCTGCTGCTACAGGTGGCGCGGCGATGGAGTACCTGGCCTCCGAGAAGTGAT | 2097 |
|        |      |    | *****                                                                                           |      |
| rabbit | 2050 | C  | CACAGGACCTGGCGCGCGCAACGTGTGTGACCGAGGACAACGTGATGAAGATCGCGGACTTGGCCTGGCGCGGAGCTGCACAACTCGACTAC    | 2149 |
| human  | 2098 | C  | CACAGGACCTGGCTGCCGCGCAACGTGTGTGACCGAGGACAACGTGATGAAGATCGCGGACTTGGCCTGGCGCGGAGCTGCACAACTCGACTAC  | 2197 |
|        |      |    | *****                                                                                           |      |
| rabbit | 2150 | T  | ACAAGAAGACCAACATGGCAGGCTGCCGTGAAGTGGTGGCGCGCGAGGCCCTGTTGACCGGCTACACCCACAGAGCGATGCTGGTCTTTCG     | 2249 |
| human  | 2198 | T  | ACAAGAAGACCAACAAAGCGCGCTGCCGTGAAGTGGTGGCGCGCGAGGCCCTGTTTACCGGCTACACCCACAGAGCGATGCTGGTCTTTCG     | 2297 |
|        |      |    | *****                                                                                           |      |
| rabbit | 2250 | G  | GGTCTGCTTTGGAGATCTTACGCTGGGGGCTGCCGTACCCCGCATCCCTGTGGAGAACTGTTCAAGTGTGAGAGAGGGCACCGCATGGA       | 2349 |
| human  | 2298 | G  | GGTCTGCTTTGGAGATCTTACGCTGGGGGCTGCCGTACCCCGCATCCCTGTGGAGAACTGTTCAAGTGTGAGAGAGGGCACCGCATGGA       | 2397 |
|        |      |    | *****                                                                                           |      |
| rabbit | 2350 | C  | AAAGCGGCAACTGACGACGACCTGTACATGATCATGCGGAGTGTGACGCGGCGCTTGCAGAGGCCACCTTCAAGCAGCTGTGGAGGAC        | 2449 |
| human  | 2398 | C  | AAAGCGGCAACTGACACACGACCTGTACATGATCATGCGGAGTGTGACGCGGCGCTTGCAGAGGCCACCTTCAAGCAGCTGTGGAGGAC       | 2497 |
|        |      |    | *****                                                                                           |      |

[illegible]

human MGAPACALALCVAVAIVAGASSESLGTEQRVVGRAAEVPGPPEPGQQEQLVFGSGDAVELS  
mouse MVVPACVLVFCVA--VVAGATSEPPGPEQRVVRRAAEVPGPPEPSQQEQVAFGSGDTVELS  
rabbit MGAPARALALCVAVVVVAGVWVEPAGPERRVRRAGVPGLEPSRQEQQVVFSGSGDTVELS  
\* .\*\* .\*.\*\*\* :\*\*\*. \* \* \* :\*\*\* \*\*\* \*\* \* . :\*\*\* : .\*\*\*\*\* :\*\*\*

human CPPPGGGPMGPTVWVKDGTGLVPSERVLVGPQRLQVLNASHEDSGAYSCRQRLTQRVLCH  
mouse CHPPGGAPTGPTVWAKDGTGLVASHRILVGPQRLQVLNASHEDAGVYSCQHRLTRRVLCH  
rabbit CHLPGGGPLGPTVWVKDGTGLASTDRILVGPQRLQVLNASQEDAGAYSCRQRLTQRVLCH  
\* \*\*\*. \* \*\*\*\*\*.\*\*\*\*\*. :. :\*\*\*\*\* :\*\*\*. :\*\*\* :\*\*\* :\*\*\*

human FSVRVTDAPSSGDDDEDGEDEAEDTGVDTGAPYWTRPERMDKLLAVPAANTVRFRCPAAG  
mouse FSVRVTDAPSSGDDDEDGEDVAE----DTGAPYWTRPERMDKLLAVPAANTVRFRCPAAG  
rabbit FIVRLTEAPSSGDDDEDGEDEAED----TGAPYWTRPERMDKLLAVPAANTVRFRCPAAG  
\* \*\* : :\*\*\*\*\* \*\* \*\*\*\*\*

human NPTPSISWLKNGREFRGEHRIGGIKLRHQQWSLVMESVVPSPDRGNITCVVENKFGSIRQT  
mouse NPTPSISWLKNGKEFRGEHRIGGIKLRHQQWSLVMESVVPSPDRGNITCVVENKFGSIRQT  
rabbit NPTPSISWLKNGKEFRGEHRIGGIKLRHQQWSLVMESVVPSPDRGNITCVVENKFGSIRQT  
\*\*\*\*\* :\*\*\*\*\*

human YTLDVLERSPHRPILQAGLPANQTAVLGSDVEFHCKVYSDAQPHIQWLKHVEVNGSKVGP  
mouse YTLDVLERSPHRPILQAGLPANQTAILGSDVEFHCKVYSDAQPHIQWLKHVEVNGSKVGP  
rabbit YTLDVLERSPHRPILQAGLPANQTAVLGSDVEFHCKVYSDAQPHIQWLKHVEVNGSKVGP  
\*\*\*\*\* :\*\*\*\*\*

human DGTPYVTVLKTAGANTTDKELEVLSLHNVTTFEDAGEYTCLAGNSIGFSHHSAWLVVLP  
mouse DGTPYVTVLKTAGANTTDKELEVLSLHNVTTFEDAGEYTCLAGNSIGFSHHSAWLVVLP  
rabbit DGTPYVTVLKTAGANTTDKELEVLSLRNVTTFEDAGEYTCLAGNSIGFSHHSAWLVVLP  
\*\*\*\*\* :\*\*\*\*\*

human EELVEADEAGSVYAGILSYGVGFLLFILVVAAVTLCRLRSPPKKGLGSPTVHKISRFP  
mouse EELMETDEAGSVYAGVLSYGVVFFLLFILVVAAVILCRLRSPPKKGLGSPTVHKISRFP  
rabbit EELAAAGEAGSVYAGVLSYAGGFLLFILVVGAVTLCRLHSPPKKGLGSPTVHKISRFP  
\*\*\* : \*\*\*\*\* :\*\*\*. \*\*\*\*\*. \*\* \*\*\*\*\* :\*\*\*\*\* :\*\*\*\*\*

human RQVSLESNASMSSNTPLVRIARLSSGEGPTLANVSELELPADPKWELSRARLTGKPLGE  
mouse RQVSLESNSSMNSNTPLVRIARLSSGEGPVLANVSELELPADPKWELSRTRLTGKPLGE  
rabbit RQVSLESSSSMNSTTPLVRVARLSSAEGPTLANVSELELPADPQWELSRARLTGKPLGE  
\*\*\*\*\* :\*. \*. \*\*\*\*\* :\*\*\*\*\*. \*\*\*. \*\*\*\*\* :\*\*\*\*\* :\*\*\*\*\*

human GCFGQVMAEAIGIDKDRAAKPVTVAVKMLKDDATDKDLSDLVSEMEMMKMIGKHKNIIIN  
mouse GCFGQVMAEAIGIDKDRTAKPVTVAVKMLKDDATDKDLSDLVSEMEMMKMIGKHKNIIIN  
rabbit GCFGQVMAEAIGIDKDRAAKPVTVAVKMLKDDATDKDLSDLVSEMEMMKMIGKHKNIIIN  
\*\*\*\*\* :\*\*\*\*\*

human LLGACTQGGPLYVLVEYAAKGNLREFLRARRPPGLDYSFDTCKPPEEQLTFKDLVSCAYQ  
mouse LLGACTQGGPLYVLVEYAAKGNLREFLRARRPPGMDYSFDACRLPEEQLTCKDLVSCAYQ  
rabbit LLGACTQGGPLYVLVEFAAKGNLREYLRRARRPPGMDYSFDTCLPEEQLTFKDLVSCAYQ  
\*\*\*\*\* :\*\*\*\*\* :\*\*\*\*\* :\*\*\*\*\* : : \*\*\*\*\* \*\*\*\*\*

human VARGMEYLASQKCIHRDLAARNVLVTEDNVMKIADFGLARDVHNLDYYKTTNGRLPVKW  
mouse VARGMEYLASQKCIHRDLAARNVLVTEDNVMKIADFGLARDVHNLDYYKTTNGRLPVKW  
rabbit VARGMEYLASQKCIHRDLAARNVLVTEDNVMKIADFGLARDVHNLDYYKTTNGRLPVKW  
\*\*\*\*\*

human MAPEALFDRVYTHQSDVWSFGVLLWEIFTLGGSPYPGIPVEELFKLLKEGHRMDKPANCT  
mouse MAPEALFDRVYTHQSDVWSFGVLLWEIFTLGGSPYPGIPVEELFKLLKEGHRMDKPASCT  
rabbit MAPEALFDRVYTHQSDVWSFGVLLWEIFTLGGSPYPGIPVEELFKLLREGHRMDKPANCT  
\*\*\*\*\* :\*\*\*\*\*. \*\*

human HDLYMIMRECWAAPSQRPTFKQLVEDLDRVLTVTSTDEYLDLSAPFEQYSPGGQDTPSS  
mouse HDLYMIMRECWAHVPSQRPTFKQLVEDLDRILT VTSTDEYLDLSVPFEQYSPGGQDTPSS  
rabbit HDLYMIMRECWAAPSQRPTFKQLVEDLDRVLTVTSTDEYLDLSAPFEQYSPGGQDSPSA  
\*\*\*\*\*. \*\*\*\*\* :\*\*\*\*\*. \*\*\*\*\* :\*\*\* :

human SSSGDDSVFAHDLPPAPPSSGGSRT  
mouse SSSGDDSVFTHDLLPPGPPSNGGPRT  
rabbit SSSGDDSVFTHDLLPPAPPSSGGPRT  
\*\*\*\*\* :\*\*\*\*\*. \*\*\*. \*\* \*\*
